# Supplementary material
Source: publisher site journal article supplement (https://www.dovepress.com/article/380629)
Supplement: Supplementary file 1 [file get_supplementary_file.php]

**Supplementary Materials**

**Sample Teleretinal Imaging Grading and Recommendation Form**

**RIGHT EYE**

| **IMAGE QUALITY** |
| --- |

**Interpretable:**

| YES ‌ | 1 |
| --- | --- |
| NO   ‌ | 2 |

**Subjective Quality:**

| ‌ | Good (Centered on Macula with optic nerve + superior and temporal arcades visible and in focus | 1 |
| --- | --- | --- |
| ‌ | Fair (Not centered [optic nerve and superior and inferior temporal arcades not visible] or not in focus) | 2 |
| ‌ | Poor (BOTH NOT Centered [Optic nerve and superior and inferior temporal arcades visible] and not inf focus) | 3 |

**Level of Diabetic Retinopathy**

| ‌ | No apparent diabetic retinopathy | 0 |
| --- | --- | --- |
| ‌ | Mild nonproliferative diabetic   retinopathy(microaneurysms only,   no hemorrhages) | 1 |
| ‌ | Moderate nonproliferative diabetic retinopathy (microaneurysms/no hemorrhages; not severe nonproliferative  diabetic retinopathy) | 2 |
| ‌ | Severe nonproliferative diabetic retinopathy (4/2/1 rule) | 3 |
| ‌ | Proliferative diabetic retinopathy (Without high risk features; no   vitreous hemorrhage) and <=1/4 disc area neovascularization of the disc and <1/2 disc area neovascularization elsewhere) | 4 |
| ‌ | High risk Proliferative diabetic retinopathy  ‌ >=1/4 disc area neovascularization of the disc  ‌ <=1/4 disc neovascularization of the disc with vitreous                         hemorrhage  ‌ >=1/2 disc area neovascularization elsewhere with            hemorrhage) | 5 |
| ‌ | Quiescent Proliferative diabetic retinopathy | 6 |
| ‌ | Cannot Grade | 8 |

**LEFT EYE**

| **IMAGE QUALITY** |
| --- |

**Interpretable:**

| YES ‌ | 1 |
| --- | --- |
| NO   ‌ | 2 |

**Subjective Quality:**

| ‌ | Good (Centered on Macula with optic nerve + superior and temporal arcades visible and in focus | 1 |
| --- | --- | --- |
| ‌ | Fair (Not centered [optic nerve and superior and inferior temporal arcades not visible] or not in focus) | 2 |
| ‌ | Poor (BOTH NOT Centered [Optic nerve and superior and inferior temporal arcades visible] and not inf focus) | 3 |

**Level of Diabetic Retinopathy**

| ‌ | No apparent diabetic retinopathy | 0 |
| --- | --- | --- |
| ‌ | Mild nonproliferative diabetic   retinopathy(microaneurysms only,   no hemorrhages) | 1 |
| ‌ | Moderate nonproliferative diabetic retinopathy (microaneurysms/no hemorrhages; not severe nonproliferative  diabetic retinopathy) | 2 |
| ‌ | Severe nonproliferative diabetic retinopathy (4/2/1 rule) | 3 |
| ‌ | Proliferative diabetic retinopathy (Without high risk features; no   vitreous hemorrhage) and <=1/4 disc area neovascularization of the disc and <1/2 disc area neovascularization elsewhere) | 4 |
| ‌ | High risk Proliferative diabetic retinopathy  ‌ >=1/4 disc area neovascularization of the disc  ‌ <=1/4 disc neovascularization of the disc with vitreous                         hemorrhage  ‌ >=1/2 disc area neovascularization elsewhere with            hemorrhage) | 5 |
| ‌ | Quiescent Proliferative diabetic retinopathy | 6 |
| ‌ | Cannot Grade | 8 |

| **Recommendation:** |
| --- |

| ‌ | Teleretinal imaging in one year | 0 |
| --- | --- | --- |
| ‌ | Next available dilated fundus exam at LCHC or elsewhere | 1 |
| ‌ | follow-up for dilated fundus examination at LCHC or elsewhere in 9-12 months | 2 |
| ‌ | follow-up for dilated fundus examination at LCHC or elsewhere in 6 months | 3 |
| ‌ | follow-up for dilated fundus examination at LCHC or elsewhere in 3 months | 4 |
| ‌ | follow-up with retina specialist (outside of LCHC) within 2 months | 5 |
| ‌ | follow-up with retina specialist (outside of LCHC) within 1 months | 6 |
| ‌ | follow-up for          at                   within | 7 |

**Supplemental Table 1:** Teleretinal Imaging Gradings vs. Dilated Fundus Examination Diagnoses for Diabetic Retinopathy (N=358).

|  | **Diagnoses based on dilated fundus examination** | |
| --- | --- | --- |
| **Teleretinal imaging gradings** | No diabetic retinopathy | Diabetic retinopathy |
| No diabetic retinopathy | 227 (63.4%) | 14 (3.9%) |
| Diabetic retinopathy | 14 (3.9%) | 103 (28.8%) |

**Supplemental Table 2:** Teleretinal Imaging Gradings vs. Dilated Fundus Examination Diagnoses for Glaucoma (N=361).

|  | **Diagnoses based on dilated fundus examination** | | |
| --- | --- | --- | --- |
| **Teleretinal imaging gradings** | No glaucoma | Open angle glaucoma suspect | Open angle glaucoma |
| No glaucoma | 312 (86.4%) | 29 (8.0%) | 1 (0.3%) |
| Possible glaucoma | 9 (2.5%) | 5 (1.4%) | 3 (0.8%) |
| Likely glaucoma | 0 | 0 | 2 (0.6%) |
